# Supplementary material
Source: PubMed Central journal article supplement (PMC5014693)
Supplement: NIHMS784097-supplement-7.pdf [file NIHMS784097-supplement-7.pdf]

Supplementary Figure 5

HF diabetic

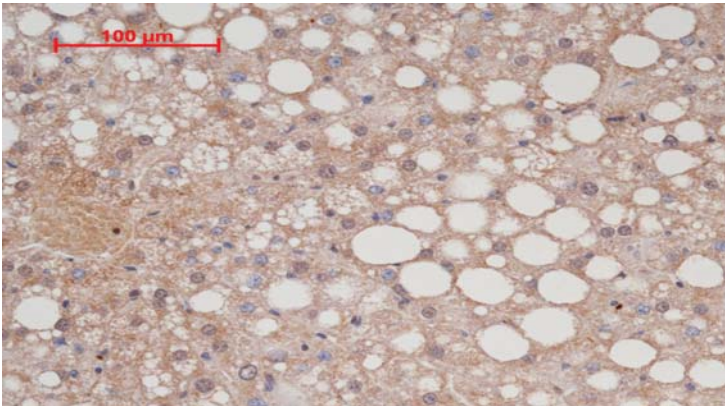

*Camp*-LV

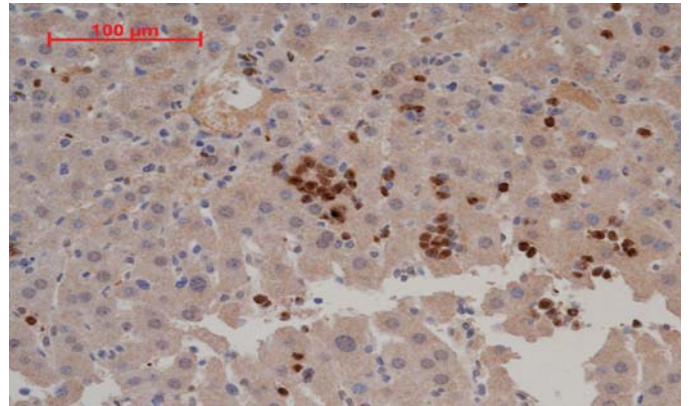

HF non-diabetic

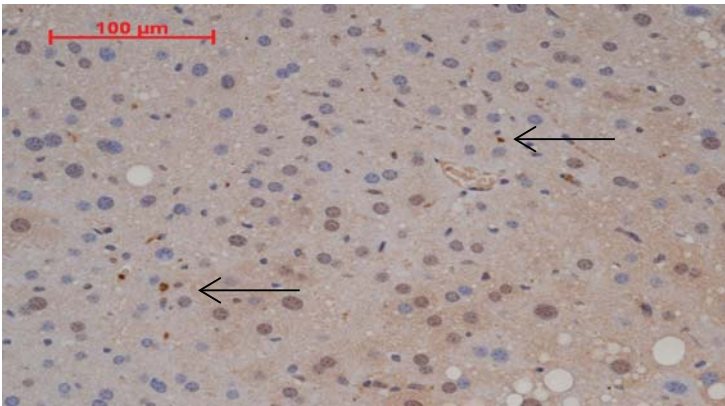

*Camp*-LV

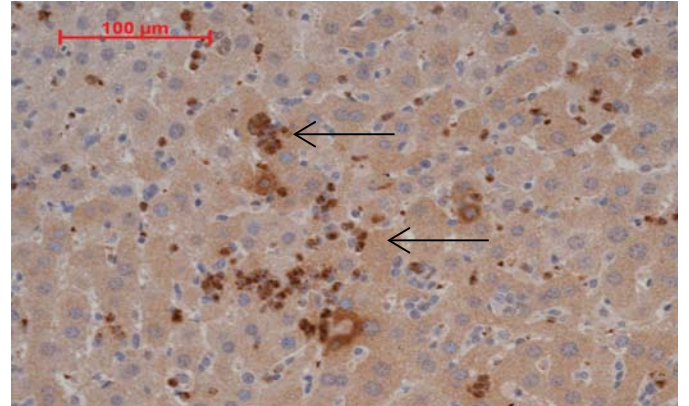

RD normal

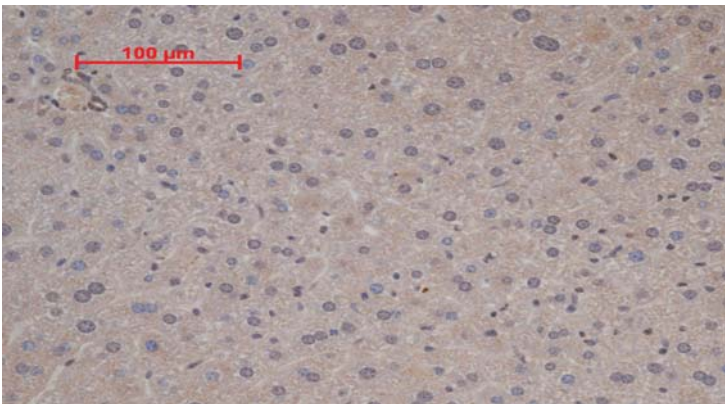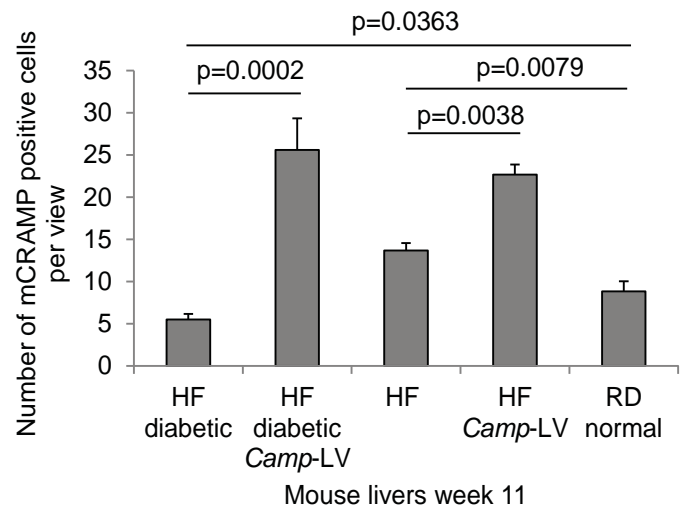

mCRAMP immunohistochemistry of mouse liver 200X
