# Supplementary material
Source: PubMed Central journal article supplement (PMC5014693)

Supplementary Figure 6

A

Non-diabetic

8 week old male c57/BL6 wild-type or *Camp*<sup>-/-</sup> mice

High-fat diet  
or regular diet

Fasting  
blood  
glucose

Echo MRI  
Dissection

Week 0 1 2 3 4 5 6 7 8 9 10 11

B

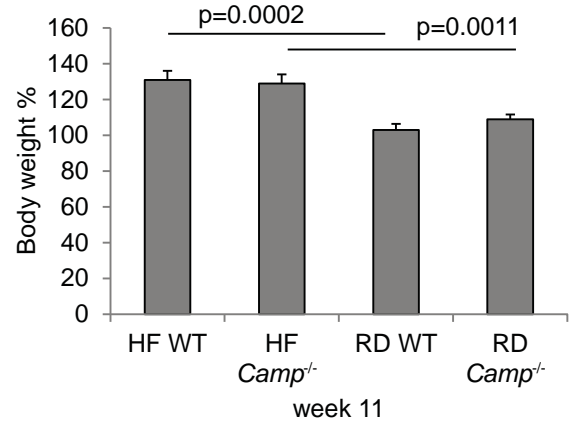

C

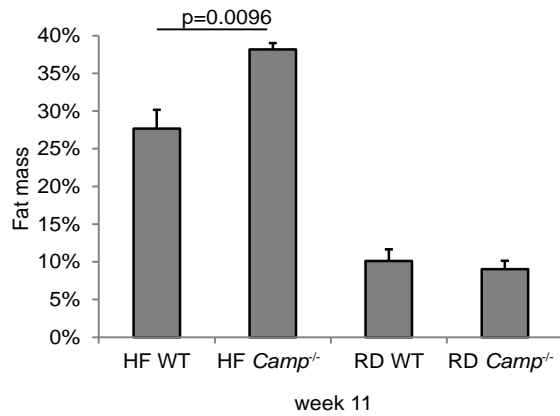

D

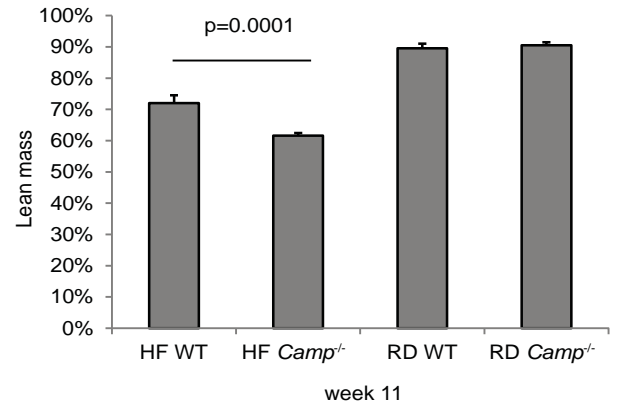

E

HF WT

HF *Camp*<sup>-/-</sup>

RD *Camp*<sup>-/-</sup>

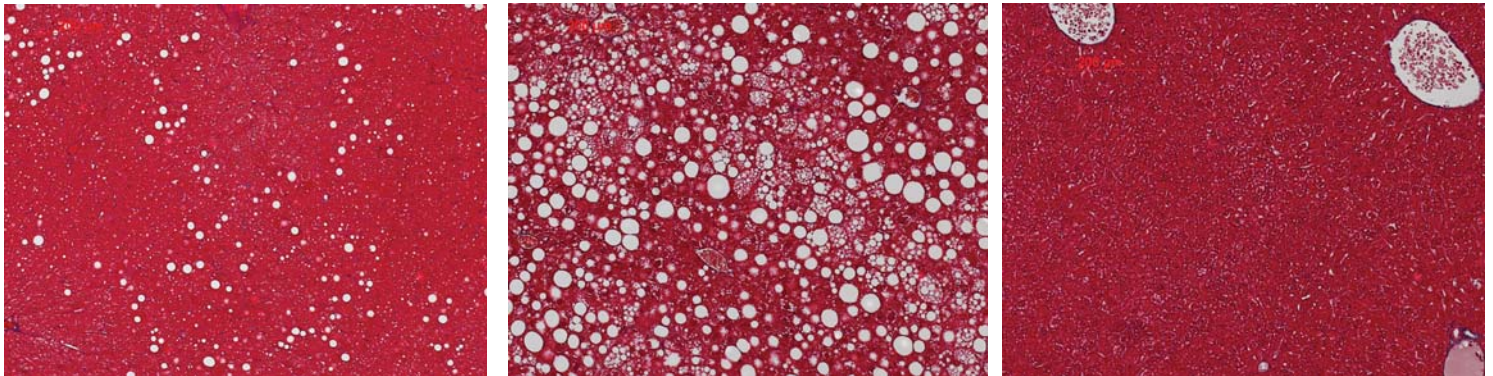

Masson Trichrome staining of liver 100X

F

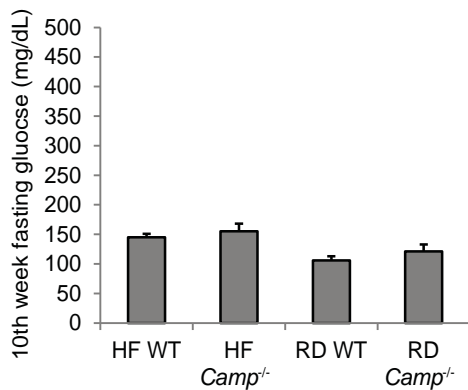

G

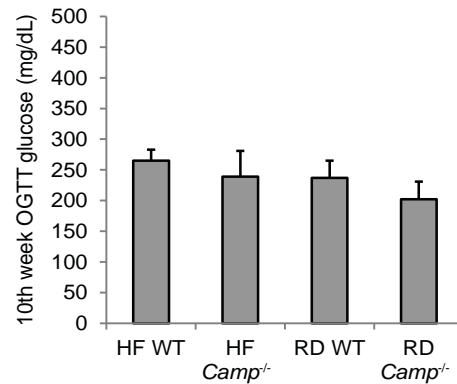

H

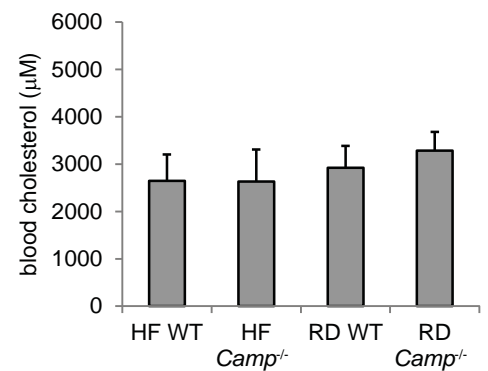

Supplement: NIHMS784097-supplement-8.pdf [file NIHMS784097-supplement-8.pdf]
