# Supplementary material
Source: PubMed Central journal article supplement (PMC5014693)

Supplementary Figure 1

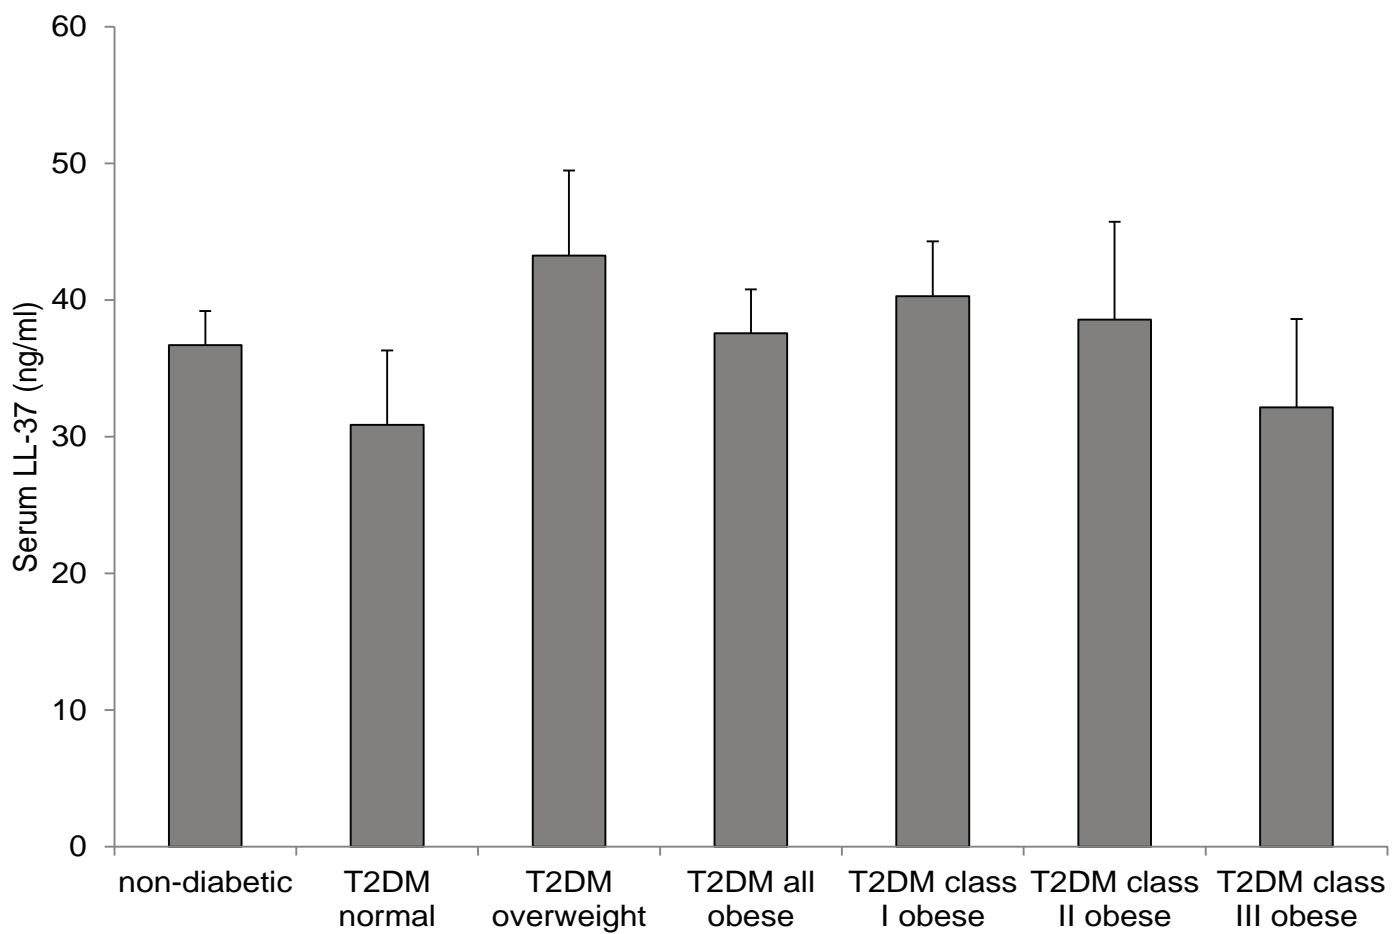

Supplement: NIHMS784097-supplement-3.pdf [file NIHMS784097-supplement-3.pdf]

Supplementary Figure 2

A

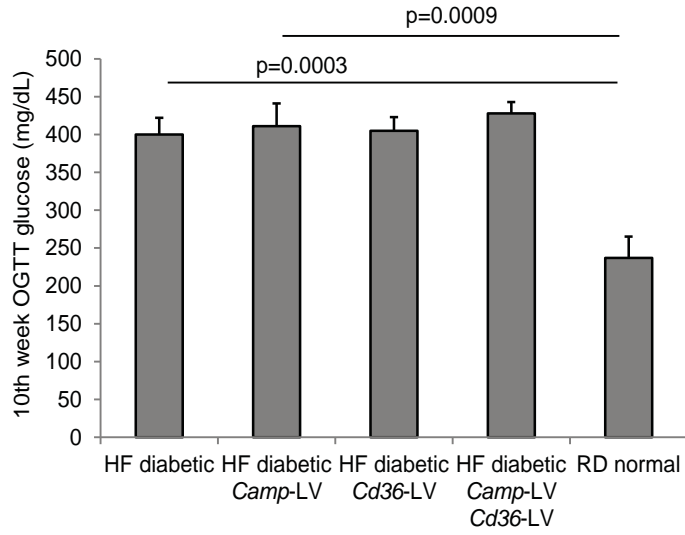

B

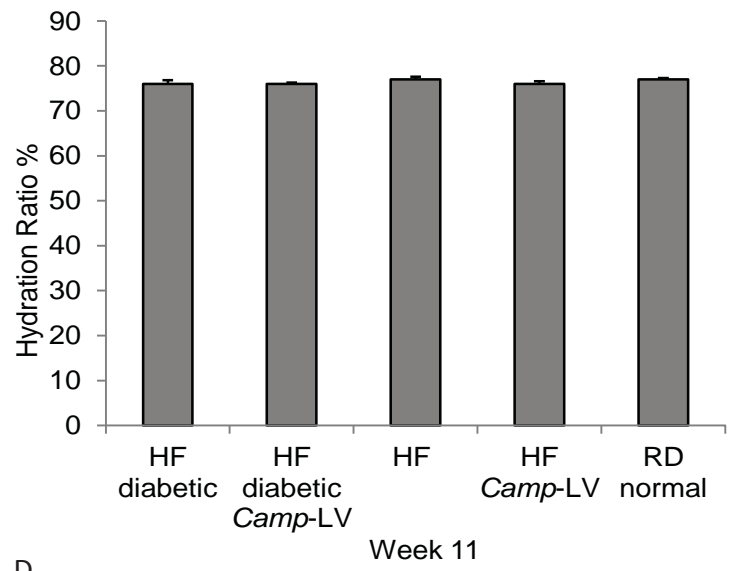

C

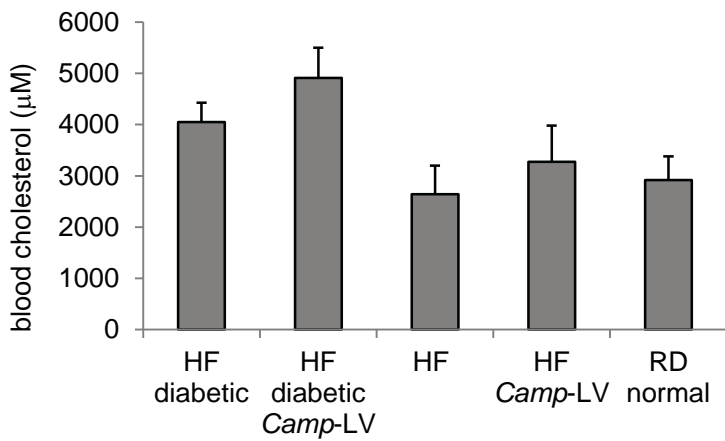

D

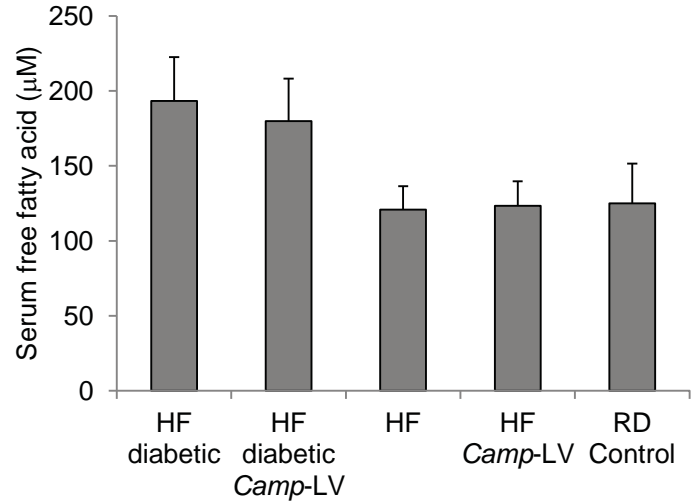

E

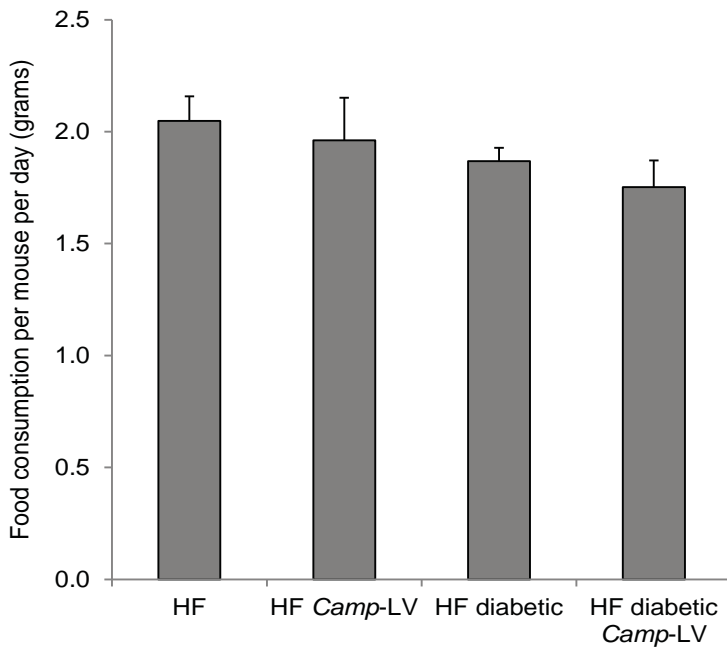

Supplement: NIHMS784097-supplement-4.pdf [file NIHMS784097-supplement-4.pdf]

Supplementary Figure 3

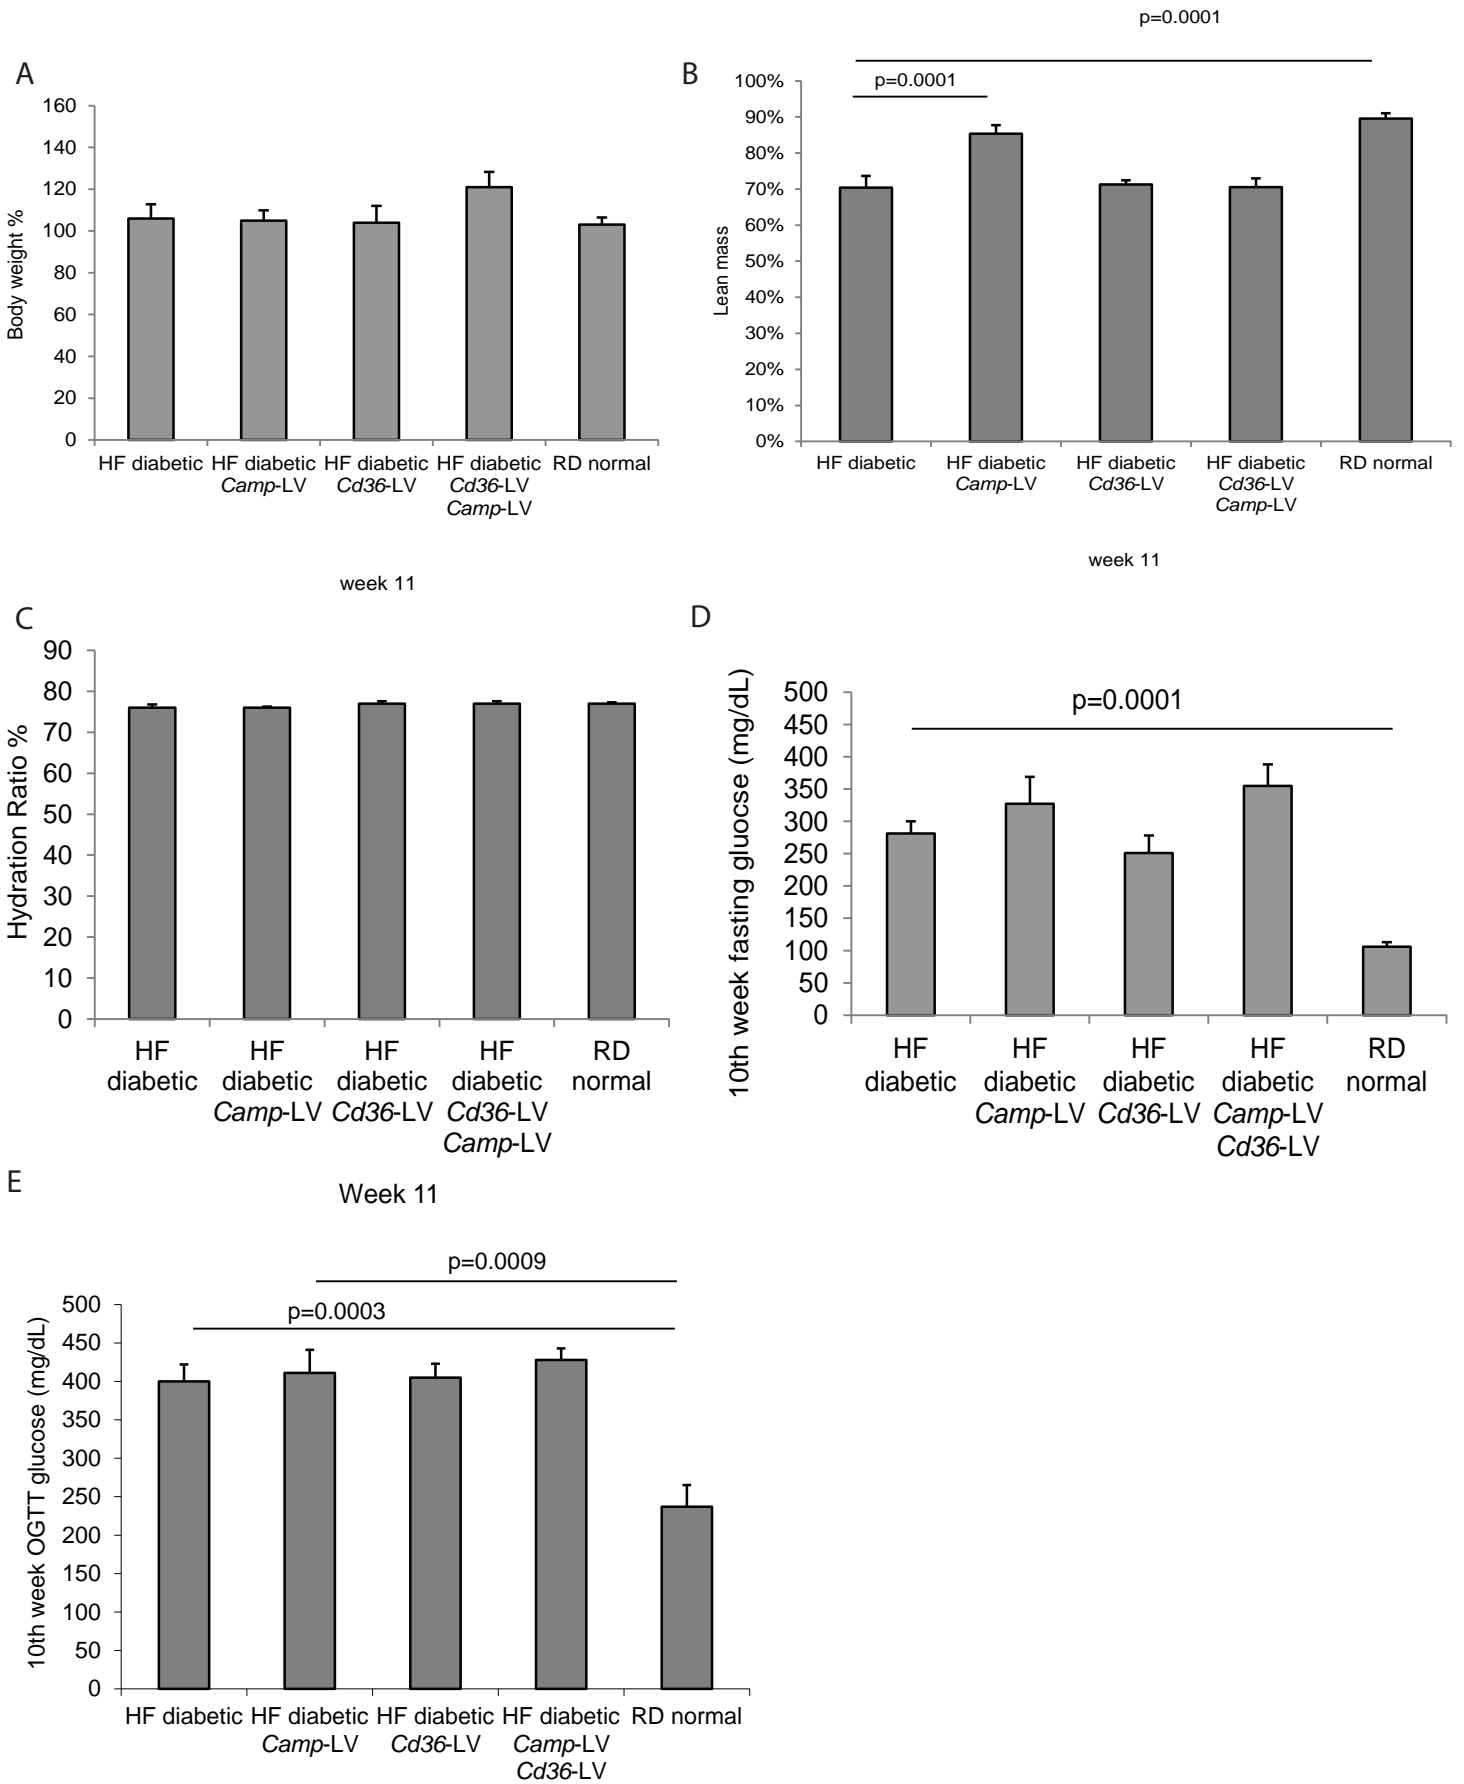

Supplement: NIHMS784097-supplement-5.pdf [file NIHMS784097-supplement-5.pdf]

Supplementary Figure 4

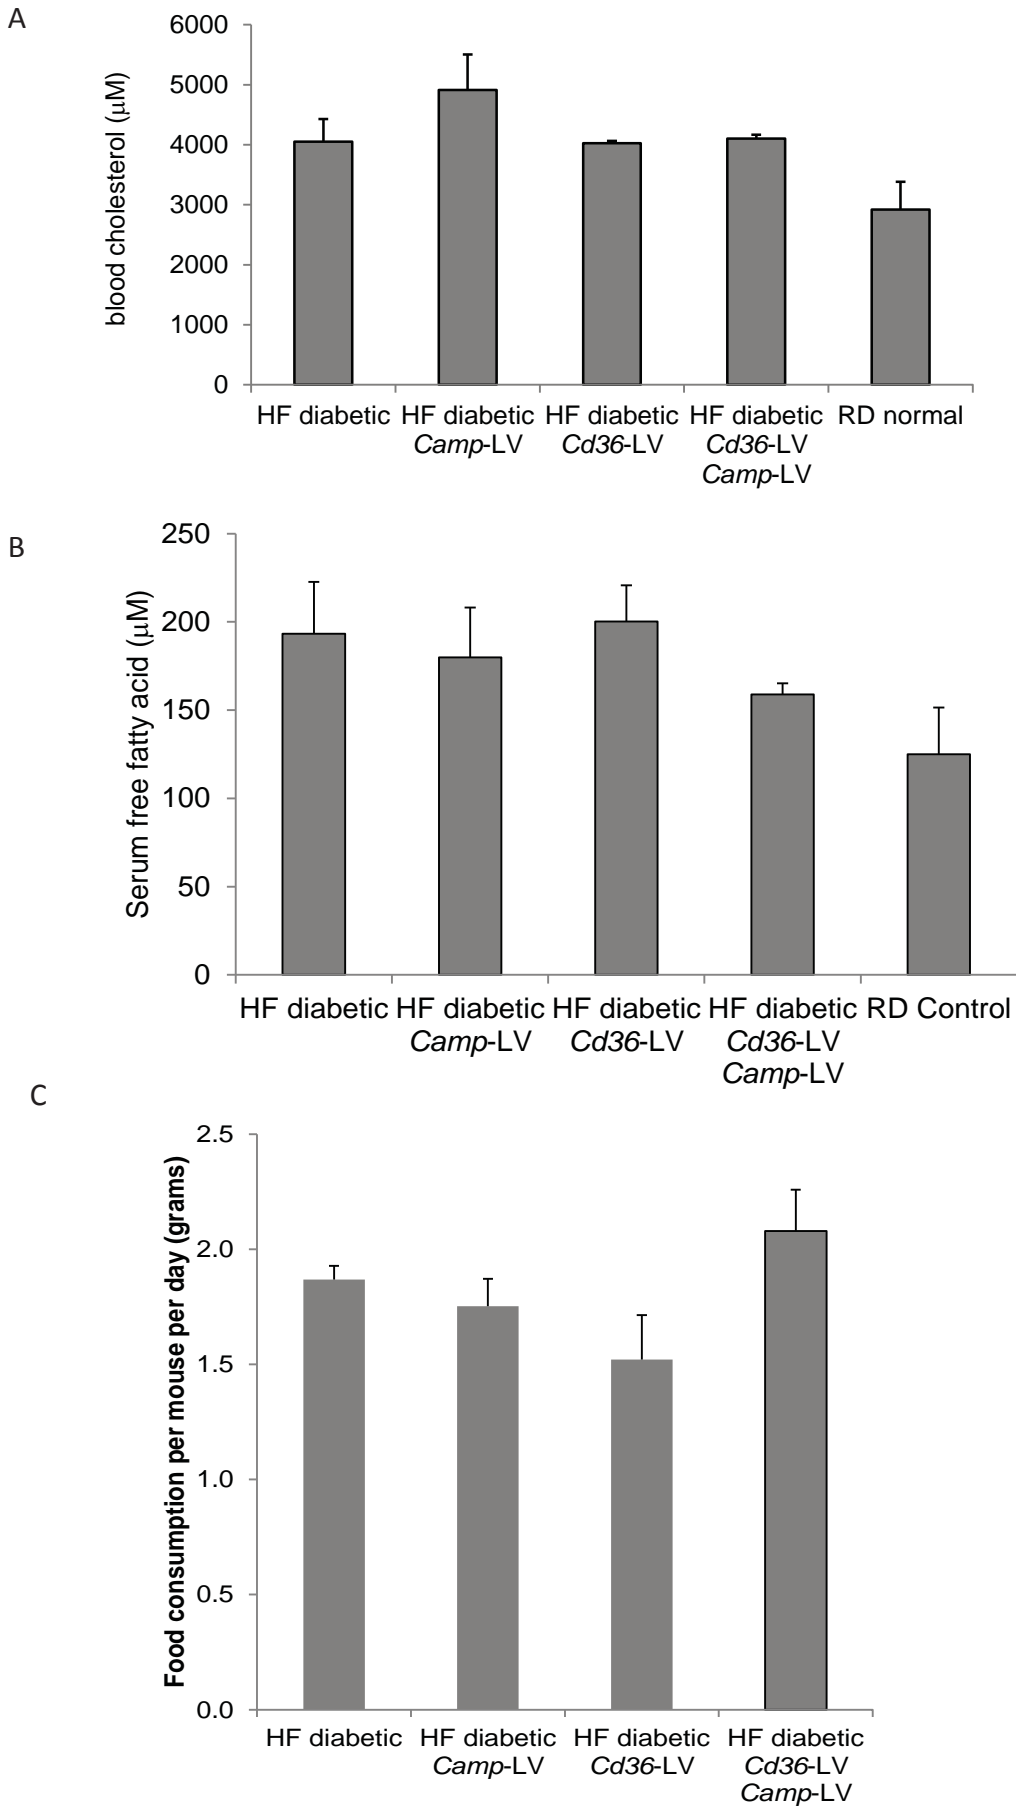

Supplement: NIHMS784097-supplement-6.pdf [file NIHMS784097-supplement-6.pdf]

Supplementary Figure 7

A

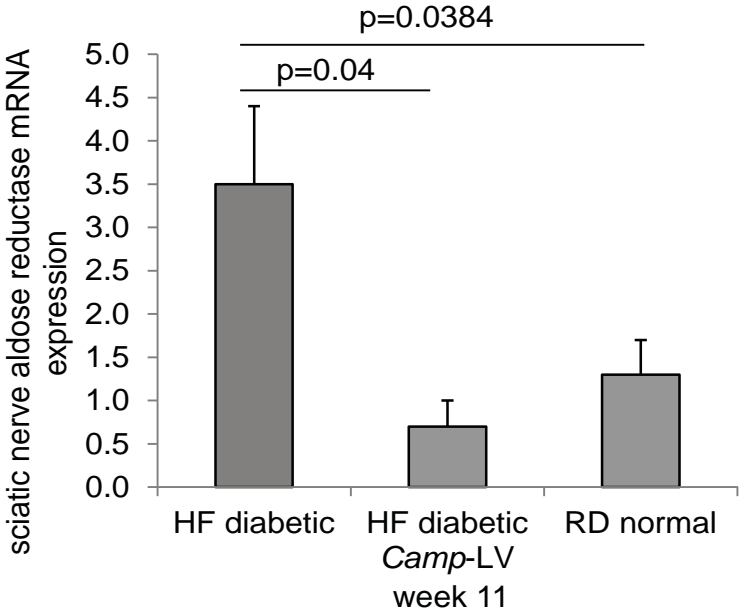

B

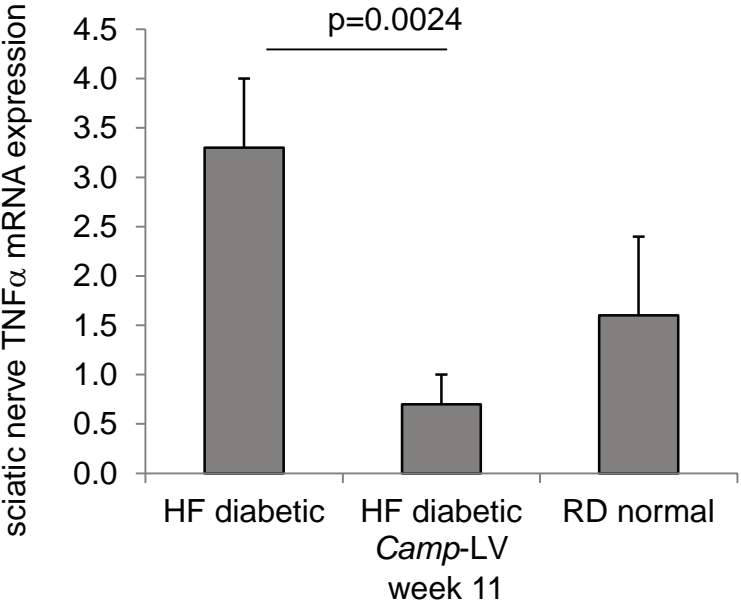

Supplement: NIHMS784097-supplement-9.pdf [file NIHMS784097-supplement-9.pdf]
